# Supplementary material
Source: publisher figshare collection journal article supplement (https://asha.figshare.com/articles/dataset/_/16915690)

**Supplemental Material S4.** Density plots and receiver operating characteristic curves for the Sentence Structure Assembly Scale. The upper panel displays the conditional distribution of the typically developing group (solid line) and the late takers (dashed line). True positive rate (TPR) and false positive rate (FPR) is a cutoff score that is  $-2$  standard deviation from the expected mean of the typically developing children. The lower panel displays the receiver operation characteristic curves along with the possible cutoff score that would yield a 0.8 true positive rate. The false positive rate for the score is also presented. Note that this scale score performs best between 30 to 48 months, with a minimum false positive rate of 0.5. For 24-month-old children, the expected distribution between the two groups is basically identical.

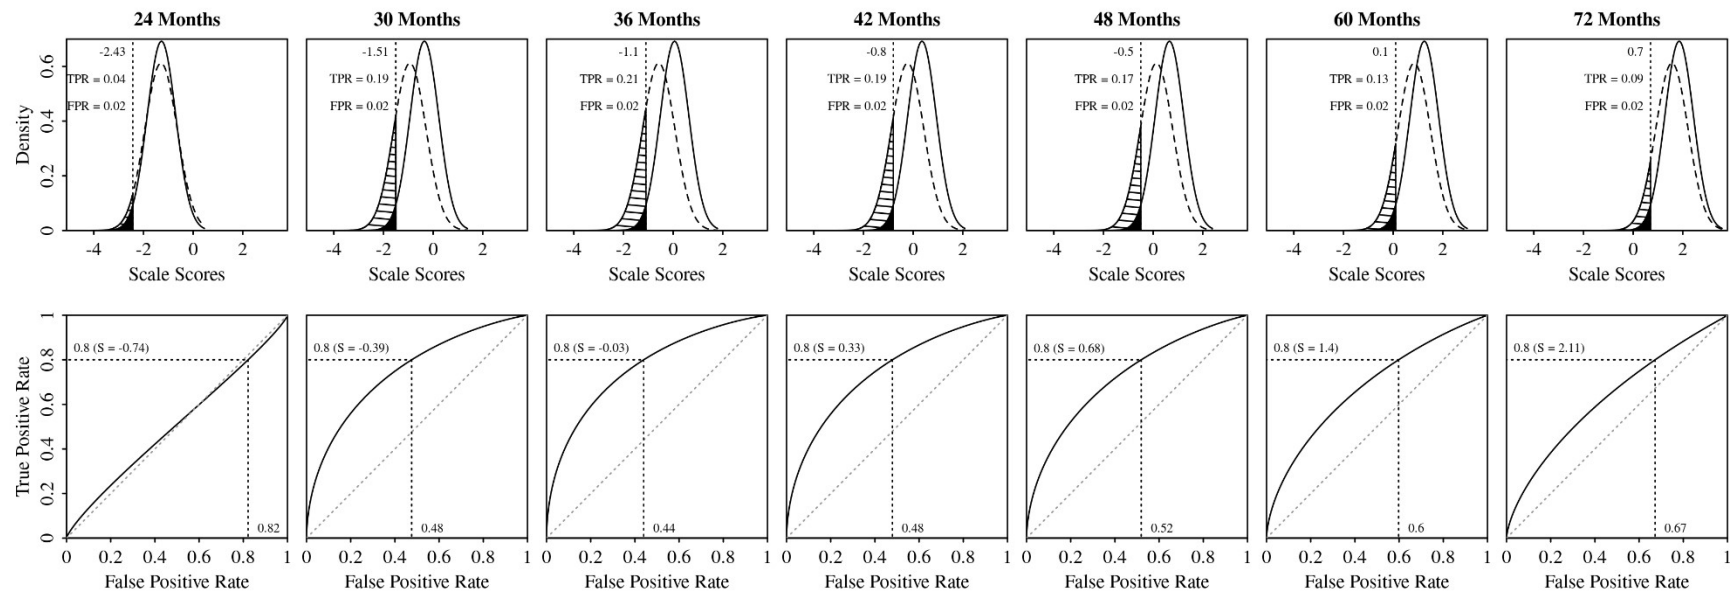

Supplement: Supplementary file 1 [file 1]
